# Supplementary material
Source: publisher site journal article supplement (https://www.spandidos-publications.com/3705/downloadSupplementary)

Figure S1. Exosome inhibitor, GW4869, reverses the effect of miR-302a. (A) Relative expression levels of miR-302a in the exosome inhibitor and control groups. (B) Cell Counting Kit-8 assay was performed. (C) Effect of the exosome inhibitor on migration and invasion was detected using a Transwell assay (200x magnification). Scale bar, 100  $\mu$ m. Data are presented as the mean  $\pm$  SD (n=3). miR-302a, microRNA-302a; OD, optical density.

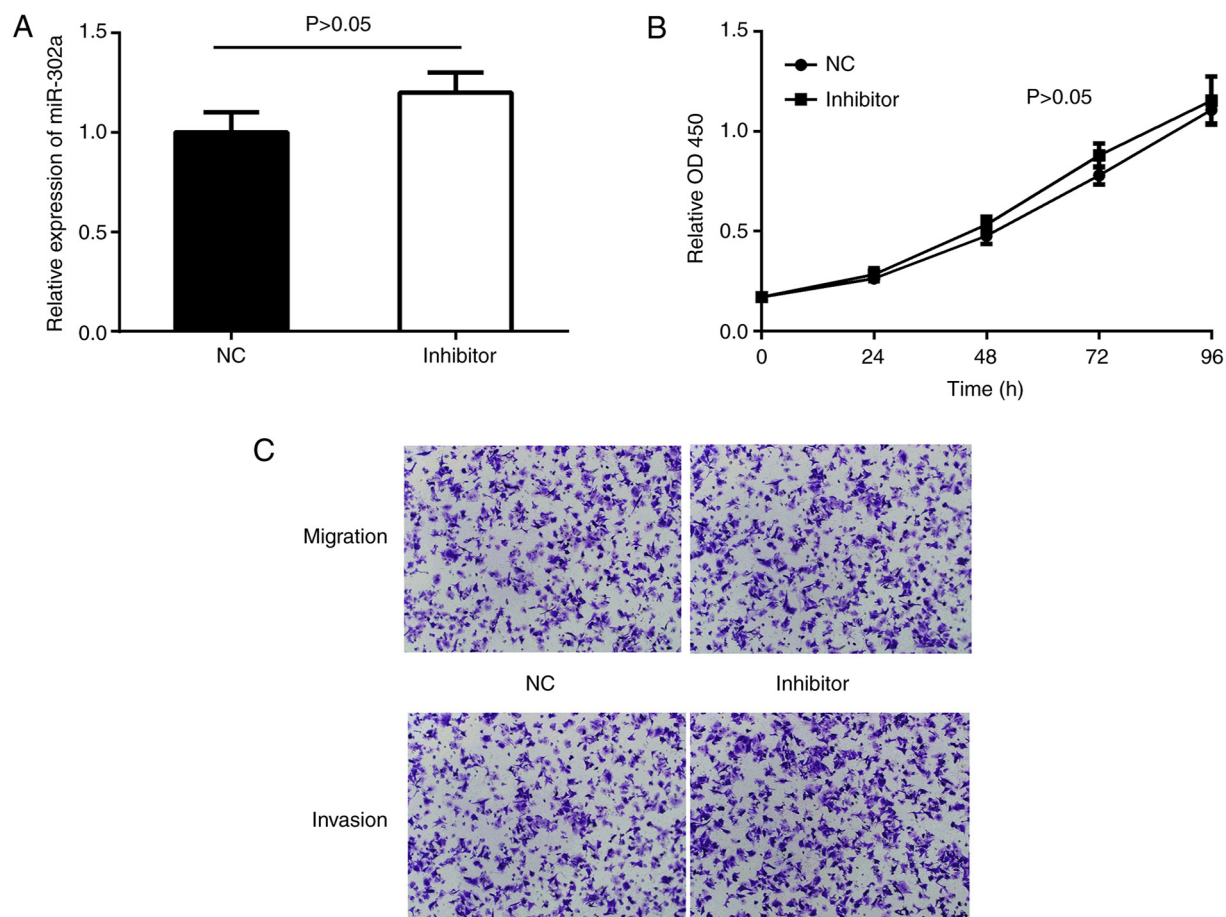

Supplement: Supplementary file 1 [file downloadSupplementary]
